## The Pupillary Light Response Reflects Visual Working Memory Content

Cecilia Hustá [1,2]

Edwin Dalmaijer [3]

Artem Belopolsky [4]

Sebastiaan Mathôt [2]

[1] Faculty of Science and Engineering, University of Groningen, The Netherlands

[2] Department of Experimental Psychology, University of Groningen, The  
Netherlands

[3] MRC Cognition and Brain Sciences Unit, University of Cambridge, United  
Kingdom

[4] Department of Experimental and Applied Psychology, VU University Amsterdam,  
Netherlands

1 **Abstract**

2

3 Recent studies have shown that the pupillary light response (PLR) is modulated by  
4 higher cognitive functions, presumably through activity in visual sensory brain areas.  
5 Here we use the PLR to test the involvement of sensory areas in visual working  
6 memory (VWM). In two experiments, participants memorized either bright or dark  
7 stimuli. We found that pupils were smaller when a pre-stimulus cue indicated that a  
8 bright stimulus should be memorized; this reflects a covert shift of attention during  
9 encoding of items into VWM. Crucially, we obtained the same result with a post-  
10 stimulus cue, which shows that internal shifts of attention within VWM affect pupil  
11 size as well. Strikingly, pupil size reflected VWM content only briefly. This suggests  
12 that a shift of attention within VWM momentarily activates an “active” memory  
13 representation, but that this representation quickly transforms into a “hidden” state  
14 that does not rely on sensory areas.

15

16 *Keywords:* pupillometry, pupil light response, visual working memory

## 17 **The Pupillary Light Response Reflects Visual Working Memory Content**

18

19 Traditionally, the pupillary light response (PLR) was considered a reflex in  
20 response to changes in environmental brightness. However, recent studies have  
21 demonstrated that the PLR is modulated by higher-level cognition (reviewed in Binda  
22 & Murray, 2015; Mathôt, 2018). Such effects likely occur when higher-level  
23 cognition affects activity in visual sensory brain areas, which is subsequently “read  
24 out” by the pupils.

25 For example, in several studies, participants were presented with both dark and  
26 bright stimuli. Participants were subsequently cued to attend to either the bright or the  
27 dark stimulus, without shifting their gaze (i.e. covert attention). Attending to the  
28 bright stimuli resulted in smaller pupils than attending to the dark stimuli (Binda,  
29 Pereverzeva, & Murray, 2013; Mathôt, van der Linden, Grainger, & Vitu, 2013;  
30 Naber, Alvarez, & Nakayama, 2013). Single-cell-recording studies have linked this  
31 effect to the frontal eye fields (FEF), a part of the frontal cortex that is associated with  
32 covert attention. Microstimulation of FEF results in increased attention to a specific  
33 part of the visual field (Moore & Fallah, 2001). Crucially, if the stimulated region  
34 corresponds to the location where a bright stimulus appears, the pupil constricts more  
35 strongly than if the stimulus appears at a different, unstimulated location (Ebitz &  
36 Moore, 2017). A similar effect has been reported for microstimulation of the superior  
37 colliculus (SC), a midbrain region that is also associated with visual attention (Wang  
38 & Munoz, in press). Taken together, both behavioral and neurophysiological studies  
39 have shown that covert visual attention enhances the PLR.

40 A PLR can even be elicited without the physical presence of bright or dark  
41 stimuli. In studies of mental imagery, participants were instructed to imagine stimuli  
42 that had previously been presented with varying brightness levels. The size of the  
43 pupil varied depending on the imagined brightness, with brighter objects resulting in  
44 smaller pupils (Laeng & Sulutvedt, 2014). This effect was replicated with mental  
45 imagery of real-life scenarios: Imagery of scenes like “a sunny sky” resulted in  
46 smaller pupils than imagery of scenes like “a dark room” (Laeng & Sulutvedt, 2014).  
47 These results are consistent with the finding that similar visual sensory areas are  
48 active during perception and mental imagery of visual objects (Ganis, Thompson, &  
49 Kosslyn, 2004). Presumably, the activity in visual sensory areas that is elicited by  
50 mental imagery subsequently affects pupil size.

51           According to many theoretical frameworks, mental imagery is highly related to  
52 visual working memory (VWM). VWM is a system with limited storage capacity that  
53 holds visual information ready for immediate use. VWM consists of encoding and  
54 maintenance. During encoding, visual stimuli are visible and a VWM representation is  
55 created (Bundesen, 1990; Dalmaijer, Manohar, & Husain, 2018). During maintenance,  
56 stimuli are no longer visible, and their VWM representations therefore need to be  
57 rehearsed so that they can be used later (Zokaei, Heider, & Husain, 2014). Analogous  
58 to mental imagery, maintaining of stimuli in VWM activates visual sensory areas (Yi,  
59 Turk-Browne, Chun, & Johnson, 2008). The similarity between mental imagery and  
60 VWM maintenance leads to the prediction that maintaining bright stimuli in VWM  
61 should lead to pupil constriction.

62           However, the only study so far that investigated this question reported that  
63 maintaining bright or dark stimuli in VWM did *not* affect the PLR (Blom, Mathôt,  
64 Olivers, & Van der Stigchel, 2016). Blom and colleagues (2016) cued participants to  
65 memorize either bright or dark objects. In different experiments, participants  
66 memorized the shape, orientation, or the exact brightness level of the stimuli. Pupil  
67 size was significantly smaller when participants were encoding the bright as compared  
68 to the dark stimuli. However, this effect faded approximately one second after the  
69 stimuli disappeared from the screen. This led Blom and colleagues (2016) to conclude  
70 that the PLR reflects VWM content during encoding, but not during maintenance.  
71 Phrased differently, the authors concluded that keeping bright or dark objects in  
72 VWM does not affect pupil size.

73           However, there are several alternative explanations for the results of Blom and  
74 colleagues (2016) that warrant a re-investigation of the question. Notably, in their  
75 experiments, participants were presented with a cue *before* (rather than after) the  
76 presentation of the brightness-related stimuli, and this cue indicated whether only the  
77 bright or only the dark stimuli needed to be memorized. Therefore, participants  
78 covertly shifted their attention to either the bright or the dark stimuli while these were  
79 actually present on the screen, leading to differences in pupil size (cf. Binda et al.,  
80 2013; Mathôt et al., 2013). Crucially, because this pupil-size difference persisted into  
81 the maintenance period, it was not clear whether any pupil-size differences during  
82 maintenance were due to VWM per se, or merely reflected a carry-over effect from  
83 the encoding phase (as Blom and colleagues concluded).

84           The question of whether brightness-related content in VWM affects pupil size is  
85 important, because, if so, this would strongly suggest that VWM relies on sensory  
86 brain areas—currently a hotly debated topic (Gayet, Paffen, & Van der Stigchel,  
87 2018; Xu, 2017). Therefore, to firmly establish whether keeping bright or dark stimuli  
88 in VWM affects pupil size, we designed a study that allowed us to distinguish any  
89 effects due to VWM encoding from effects due to VWM maintenance. In one  
90 condition of our experiment, we wanted to replicate the effect of covert visual  
91 attention on the PLR (Binda et al., 2013; Blom et al., 2016; Mathôt et al., 2013). As  
92 shown in many earlier studies, we expected that directing covert attention to dark or  
93 bright stimuli during VWM encoding would be reflected in the PLR. In another  
94 condition, we introduced a retro-cue to investigate the relationship between VWM  
95 maintenance and the PLR (cf. Belopolsky & Theeuwes, 2011). Participants were  
96 instructed to first encode both bright and dark stimuli, so that the encoding phase was  
97 identical in all trials. Subsequently, participants dropped one stimulus from VWM  
98 when the retro-cue was presented, leaving either only bright or only dark stimuli for  
99 maintenance in VWM. Crucially, we predicted that maintaining bright stimuli would  
100 result in smaller pupils as compared to maintaining dark stimuli.

101

102

## Results

103

### Experiment 1

104

105           Experiment 1 included two conditions: Pre-Cue and Retro-Cue (Figure 1a &  
106 1c). In the Pre-Cue condition, participants were cued to either attend to the stimulus  
107 appearing on the left or right side. Next, they were presented with one bright and one  
108 dark circle. The participants' task was to maintain the precise brightness level of the  
109 cued circle. Finally, after a retention interval of 4 s, participants indicated whether the  
110 brightness of a newly presented circle was the same as, or different from, the  
111 brightness of the memorized circle. The Retro-Cue Condition was almost identical to  
112 the Pre-Cue Condition, with the important difference that the to-be-memorized stimuli  
113 were shown before the cue. We used a Quest adaptive procedure (Watson & Pelli,  
114 1983) to ensure that the response accuracy for both bright and dark stimuli was kept at  
115 around 75%. In the Pre-Cue Condition, the mean accuracy was 75% for bright trials  
116 and 74% for dark trials. In the Retro-Cue Condition, the mean accuracy was 71% for  
117 bright and 69% for dark trials.

118 We conducted a linear mixed effects analysis (LME) on all trials (correct and  
119 incorrect; analyzing only correct trials did not qualitatively change the results) with  
120 Pupil Size as dependent measure, and two fixed effects, each containing two levels  
121 (Brightness: Bright and Dark; Condition: Pre-Cue and Retro-Cue). We include by-  
122 participant random intercepts and slopes for all fixed effects. This analysis was  
123 conducted for each 10 ms time window separately. We considered effects significant  
124 if  $t > 1.96$  (cf. Mathot et al., 2014; Mathôt et al., 2013), although we emphasize  
125 overall patterns and effect sizes rather than significance of individual data points.  
126 There was a significant interaction between Brightness and Condition between 5100  
127 ms and 5590 ms, indicating that right at the start of the maintenance phase, the effect  
128 of brightness depended on the condition (Pre-Cue or Retro-Cue). Subsequently, we  
129 performed two separate LMEs for the two conditions (also run with all trials).

130 For the Pre-Cue Condition, there was a significant effect of Brightness from  
131 4700 ms to 6990 ms, meaning that the pupil difference appeared during encoding of  
132 the brightness-related stimuli and briefly persisted into the maintenance phase (Figure  
133 1a). Twenty-three participants (out of 30) exhibited the effect in the expected  
134 direction (Figure 1b). In general, this means that when participants covertly attended  
135 to the white circles on the encode screen, their pupils were smaller than when they  
136 attended to the black circles.

137 In the Retro-Cue Condition, there was an effect of Brightness from 4900 ms  
138 until 5790 ms (Figure 1c), directly corresponding to the maintenance phase. The  
139 effect occurred in the expected direction for 19 participants (out of 30; Figure 1d).  
140 This indicates that VWM content is reflected in the PLR not only during encoding but  
141 also during maintenance. Phrased differently, shifting attention within VWM  
142 representations (that are brightness-related) is reflected in pupil size, such that  
143 internally shifting attention toward bright stimuli elicits smaller pupils than internally  
144 shifting attention toward dark stimuli.

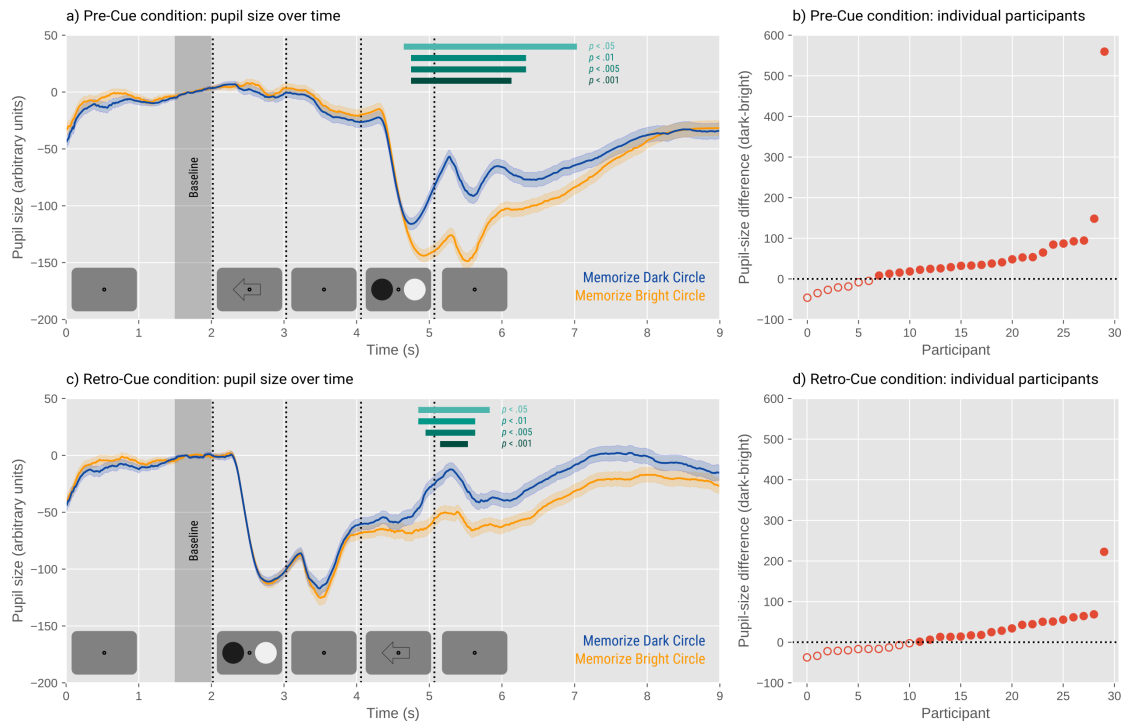

145

146 **Figure 1.** Results of Experiment 1. a) This figure shows averaged pupil size for all  
147 participants through the progression of all Pre-Cue trials. The orange line represents  
148 the average pupil size when bright stimuli are the targets and the blue line when dark  
149 stimuli are the targets. The shaded error bands represent the grand standard error  
150 (i.e. across individual trials). b) Shows the average effects of individual participants  
151 in the Pre-Cue Condition between 4000 ms and 6000 ms calculated by subtracting the  
152 mean pupil size for bright trials from dark trials. c) Shows averaged pupil size for all  
153 participants through the progression of all Retro-Cue trials. d) Shows the average  
154 effects of individual participants in the Retro-Cue Condition calculated in the same  
155 way as for the Pre-Cue Condition.

156

157 In summary, by using a retro-cue to shift attention within vWM representations,  
158 we were able to examine the relationship between maintenance of brightness-related  
159 content and pupil size while keeping stimulus encoding constant. Our results clearly  
160 show that shifting attention to bright stimuli in vWM results in pupil constriction  
161 relative to maintaining dark stimuli.

162

## 163 Experiment 2

164

165

In Experiment 2, we investigated if the relationship between the VWM content and the PLR depends on whether VWM representations are in a high- or low-priority

166 state, following single-item-template theories that postulate that only a single VWM  
167 item can be in a high-priority state at a time, and that only this item is represented in  
168 visual sensory areas (Folk & Anderson, 2010; Houtkamp & Roelfsema, 2009;  
169 Oberauer, 2002; Olivers, Peters, Houtkamp, & Roelfsema, 2011; Zokaei, Manohar,  
170 Husain, & Feredoes, 2014), and thus affects the size of the pupil. We investigated this  
171 by varying memory load. Participants were either asked to maintain one item or two  
172 items during the retention interval. Single-item-template theories would predict that  
173 the PLR would reflect VWM content only when participants maintained one item,  
174 which was in a high-priority state, and not when participants maintained two items,  
175 which would then compete with each other and both take on a low-priority state (cf.  
176 Olivers et al., 2011; van Moorselaar, Theeuwes, & Olivers, 2014).

177 We designed two conditions: Set-Size-One and Set-Size-Two. The Set-Size-  
178 One Condition was an exact replication of the Retro-Cue-Condition (Figure 2a). In the  
179 Set-Size-Two Condition, we presented participants with four stimuli during the  
180 encoding phase. The retro cue indicated whether the two circles on the right or on the  
181 left were task relevant. During the response phase, participants had to indicate  
182 whether the two new circles were both identical to the memorized circles, or if one of  
183 them was different (Figure 2c). A Quest adaptive procedure (Watson & Pelli, 1983)  
184 controlled for accuracy separately for the Bright and Dark Conditions as well as for  
185 the Set-Size-One and Set-Size-Two Conditions to try to keep accuracy at a constant  
186 75% in all conditions. In the Set-Size-One Condition, the mean accuracy for the bright  
187 trials was 69% and 68% for the dark trials. In the Set-Size-Two Condition, the  
188 accuracy was 74% for the bright and 71% for the dark trials.

189 A similar analysis was performed as for Experiment 1, using Brightness (Bright  
190 and Dark) and Memory Load (Set-Size-One and Set-Size-Two) as fixed effects. This  
191 analysis revealed no interaction between Memory Load and Brightness after the  
192 presentation of the retro cue. This means that the effect of brightness on the PLR did  
193 not notably differ between the two memory-load conditions. This suggests that the  
194 effect of brightness-related VWM content on the PLR does not crucially depend on  
195 the priority status of the items in VWM. (There was a spurious interaction between  
196 Brightness and Condition from 2100 ms to 2290 ms, which corresponded to the  
197 encoding phase. However, no interaction could occur before presentation of the  
198 targets, as participants were not aware which brightness would have to be encoded,  
199 and hence this effect is necessarily spurious.)



200 Despite not finding a significant interaction in the overall model, we analyzed  
201 the two Memory Load conditions separately. In the Set-Size-One Condition, we  
202 replicated the significant effect of Brightness on pupil size between 5000 ms and 5290  
203 ms, meaning that on average, the participants' pupils were smaller when maintaining  
204 bright circles as compared to the dark at the beginning of the maintenance phase  
205 (Figure 3a). However, it should be noted that this effect was weaker and present for  
206 fewer ( $N = 18$ , of 30) participants than in Experiment 1.

207 The Set-Size-Two Condition revealed no significant effects of brightness on  
208 pupil size (Figure 2c). However, because the effect was qualitatively in the same  
209 direction as for the Set-Size-One Condition, and because the interaction between  
210 Brightness and Memory Load was not reliable, we do not draw any conclusions about  
211 an effect of Memory Load. Eighteen participants (out of 30) had smaller pupils when  
212 maintaining bright stimuli as compared to the dark in the Set-Size-Two Condition  
213 (Figure 2d).

214

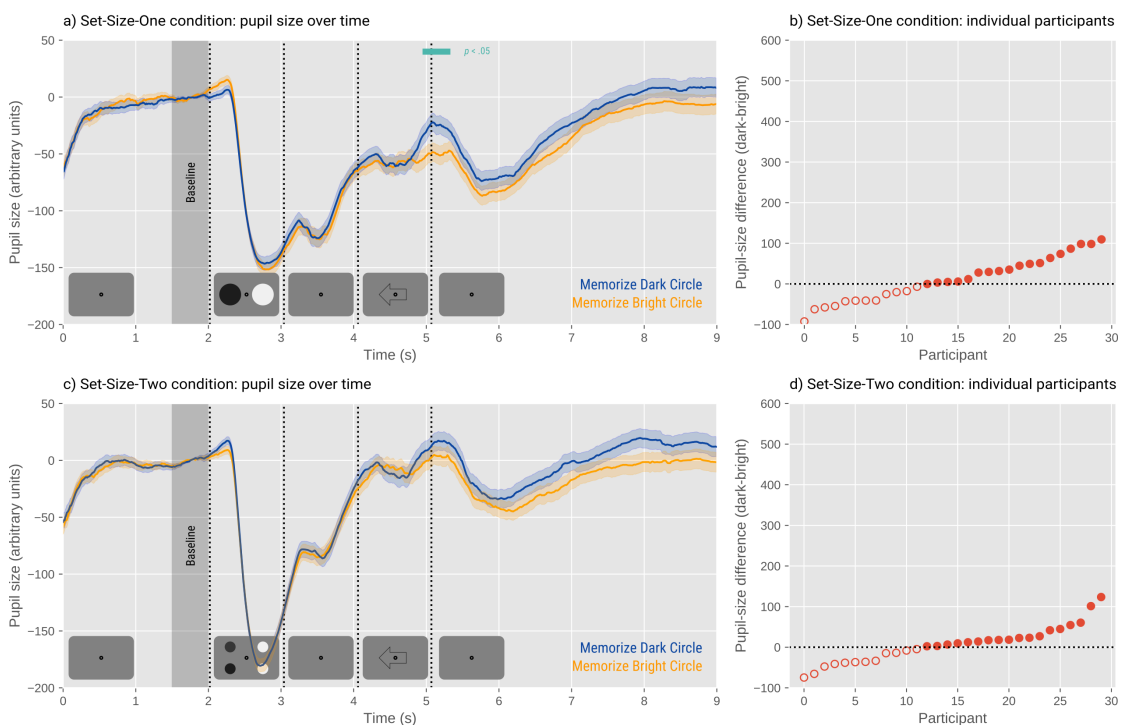

215

216 **Figure 2.** Results of Experiment 2. a) This figure shows averaged pupil size for all  
217 participants through the progression of all Set-Size-One trials. The orange line  
218 represents the average pupil size when bright stimuli are the targets and the blue line  
219 when dark stimuli are the targets. The shaded error bars represent the grand  
220 standard error (i.e. across individual trials). b) Shows the average effects of

221 *individual participants in the Set-Size-One Condition between 4000 ms and 6000 ms*  
222 *calculated by subtracting the summed pupil size for bright trials from dark trials. c)*  
223 *Shows averaged pupil size for all participants through the progression of all Set-Size-*  
224 *Two trials. d) Shows the average effects of individual participants in the Set-Size-Two*  
225 *Condition calculated in the same way as for the Pre-Cue Condition.*

226

227

## Discussion

228

229 In two experiments, we examined whether visual working memory (VWM)  
230 content is reflected in the pupillary light response (PLR). Specifically, we wanted to  
231 know whether maintaining bright stimuli in VWM is associated with smaller pupils  
232 than maintaining dark stimuli. Overall, we showed that VWM content is reflected in  
233 the PLR during both encoding and maintenance. Consistent with previous studies  
234 (Binda et al., 2013; Laeng & Sulutvedt, 2014; Mathôt et al., 2013), this shows that the  
235 PLR, which was previously thought of as a simple reflex, is controlled by higher  
236 cognitive processes, such as working memory. Our results further suggest that VWM  
237 involves sensory representations, presumably in visual cortex (Yi et al., 2008), which  
238 subsequently trigger pupil responses.

239 A striking aspect of our results is the time course (in the Retro-Cue Condition of  
240 Experiment 1, and the Set-Size-One Condition of Experiment 2). The content of  
241 VWM affected pupil size only briefly after the presentation of the retro-cue, rather  
242 than throughout the entire retention interval. This was unexpected, considering that  
243 we anticipated that this effect reflected maintenance of different brightness levels,  
244 which should occur during the entire retention interval. However, this finding is  
245 consistent with recent studies showing that VWM maintenance is not accompanied by  
246 sustained activity in visual sensory brain areas, but rather that such activity is  
247 periodical or transient (Rose et al., 2016; Sprague, Ester, & Serences, 2016;  
248 Sreenivasan, Curtis, & D'Esposito, 2014; Stokes, 2015; Wolff, Jochim, Akyürek, &  
249 Stokes, 2017). Our finding that pupil size reflects VWM content only briefly may  
250 reflect a transition from an 'active' state (which is reflected in pupil size) to a 'hidden'  
251 state (which is not reflected in pupil size). This provides unique new support for the  
252 notion of hidden VWM states, which has so far come primarily from decoding  
253 analyses in brain imaging; however, decoding studies provide inconclusive evidence  
254 for hidden states, because simulations indicate that re-emerging stimulus decodability

255 in neuroimaging data could also reflect sustained neural activity (Schneegans & Bays,  
256 2017).

257         We did not find a compelling dissociation between maintenance of one or two  
258 brightness-related stimuli. Such a dissociation would be predicted by strong single-  
259 item-template theories, which hold that there can be only one active item in VWM at  
260 a time, and that competition within VWM representations avoids any item from  
261 becoming active when multiple items are kept in VWM (van Moorselaar et al., 2014).  
262 We found qualitatively similar, but weaker effects on pupil size with a memory load  
263 of two items, as compared to one item. Overall, our results suggest that whether a  
264 VWM item is in an active or “silent” state depends strongly on time, and at most  
265 weakly on memory load.

266         So why is pupil size affected by the content of VWM and other cognitive  
267 factors? Possibly, the effect of higher cognitive functions on pupil size are preparatory  
268 mechanisms that optimize pupil size in anticipation of an environmental change in  
269 brightness (Mathôt, van der Linden, Grainger, & Vitu, 2015). For example, if you are  
270 in the dark and think about turning on a lamp, it is likely that you are going to do this  
271 soon. Therefore, it might be beneficial for your pupils to constrict before a sudden  
272 change of luminance impairs your vision.

273

## Methods

274

275 Participant data, experimental scripts, and analysis scripts are available  
276 from <https://osf.io/ejxfa/>.

277

### 278 **Experiment 1**

#### 279 *Participants*

280 We recruited 30 first-year psychology students from the University of  
281 Groningen, who participated in the present study for course credit. All participants  
282 had normal or corrected to normal vision, except for two participants, who took part  
283 in the experiment without their glasses, as calibration was not possible with them. The  
284 age of the participants ranged between 18 and 54 ( $M = 21$ ,  $SD = 6.47$ ), and 23  
285 participants were females, six were males, and one identified as different gender. Both  
286 experiments were approved by the local ethics review board of the Department of  
287 Psychology of the University of Groningen (17370-S-NE).

#### 288 *Apparatus*

289 Participants' eye movements and pupil sizes were recorded with an Eyelink  
290 1000 (SR Research, Mississauga, Canada, ON), and the data was sampled at 1000 Hz.  
291 The data was collected by recording the size of the right pupil of all of the  
292 participants. The collection was done in a dark room and participants were asked to  
293 place their head in a chin rest throughout the experiment. The task was designed with  
294 OpenSesame 3.2.0 (Mathôt, Schreij, & Theeuwes, 2012), using the PyGaze plug-ins  
295 for eye tracking (Dalmaijer, Mathôt, & Van der Stigchel, 2014). The stimuli were  
296 presented on a monitor with LCD display with 60 Hz refresh rate and resolution of  
297 1920 x 1080.

#### 298 *Procedure and Stimuli*

299 Before the experiment started, the eye tracker was calibrated with a five-point  
300 calibration procedure. Afterward, participants took part in a task in which they  
301 memorized a particular brightness level of black and white circles that appeared on a  
302 grey background ( $62 \text{ cd/m}^2$ ). Participants were instructed to keep their eyes focused  
303 on a black fixation dot ( $2 \text{ cd/m}^2$ ) that was in the center at all times. This was ensured  
304 by presenting a drift correction at the beginning of each trial, which paused the  
305 experiment unless participants shifted their gaze back to the center. Participants had a

306 chance to get familiar with the task during a practice phase (10 trials). Experiment 1  
307 was composed of 16 blocks, each lasting 3.47 minutes at most (excluding the duration  
308 of the drift corrections); the precise duration depended on the speed of responses.  
309 Each block consisted of 16 trials, with half the trials belonging to the Pre-Cue and half  
310 to the Retro-Cue Condition presented in random order.

311 In the Pre-Cue condition participants were initially presented with a cue (arrow  
312 pointing to the left or right) indicating whether the stimulus on the left or right would  
313 be task relevant. Subsequently two stimuli appeared (one black and one white circle),  
314 one of which they had to encode. This was followed by a retention interval lasting for  
315 4 seconds. During the response phase, participants were presented with a circle of the  
316 same or a similar brightness as the one they had memorized. Participants had to report  
317 whether the brightness of this circle was the same as, or different from, the one they  
318 had memorized. The Retro-Cue Condition was almost identical to the Pre-Cue one,  
319 however, the order of the cue and target were reversed. (For durations of individual  
320 phases of the trial see Figure 1a and 1c.)

321 The targets for the bright and dark trials were selected from a specified  
322 brightness ranges. The bright range extended from 88 cd/m<sup>2</sup> to 96 cd/m<sup>2</sup>, and the dark  
323 range extended from 11 cd/m<sup>2</sup> to 19 cd/m<sup>2</sup>. A different response stimulus was brighter  
324 on some trials and darker on others. The size of this difference was controlled by a  
325 Quest adaptive procedure. It was implemented to control for participants' accuracies,  
326 holding them constant at 75% for dark and bright stimuli separately.

327 After participants completed the task, they were asked about the strategies they  
328 used throughout the experiment (see supplementary materials at  
329 <https://osf.io/ejxfa/>).

### 330 *Exclusion Criteria*

331 For both conditions, trials in which the pupil at baseline was smaller than 2.1  
332 mm in diameter or greater than 6.8 mm in diameter ( $N(\text{trial}) = 1$ ) were excluded (as  
333 values above these were clear outliers based on a visual inspection of the pupil-  
334 baseline histogram). Additionally, in the Pre-Cue Condition, trials were excluded if  
335 participants horizontal gaze position deviated from the central band (between the  
336 targets) position during the presentation of the encode screen ( $N(\text{trial}) = 522$ ). No such  
337 exclusion criteria were introduced for the Retro-Cue Condition, considering that  
338 participants did not know which stimulus was the target during the presentation of the

339 encode screen, and eye movements could therefore not be systematically biased  
340 towards the to-be-memorized stimulus.

341

## 342 **Experiment 2**

### 343 *Participants*

344 Thirty participants were recruited from the same sample pool as in Experiment  
345 1. All participants had normal or corrected to normal vision. The age of the  
346 participants ranged between 18 and 34 ( $M = 21.03$ ,  $SD = 3.00$ ), and 19 were females  
347 and 11 were males.

### 348 *Apparatus*

349 The same setup as in Experiment 1 was used.

### 350 *Procedure and Stimuli*

351 Identical calibration and drift correction procedures were used as in Experiment  
352 1. The goal of the task was again to remember brightness level of black and white  
353 stimuli, but the number of stimuli varied. Participants had a chance to get familiar  
354 with the task during a practice phase (16 trials). Experiment 2 was composed of 14  
355 blocks, each again lasting at most 3.47 minutes (excluding the duration of the drift  
356 corrections). Each block consisted of 16 trials; in eight trials participants had to  
357 maintain one stimulus (Set-Size-One Condition) and in the other eight trials they had  
358 to maintain two stimuli (Set-Size-Two Condition) in their VWM. The stimuli were  
359 dark on half of the trials and bright on the other half, all appearing on grey  
360 background ( $62 \text{ cd/m}^2$ ). The conditions were presented in random order within blocks.

361 The sequence of both conditions was the same as in the Retro-Cue Condition in  
362 Experiment 1. The Retro-Cue Condition from Experiment 1 was identical to the Set-  
363 Size-One Condition in Experiment 2, in which participants had to maintain one  
364 stimulus in VWM (Figure 2a). In Set-Size-Two Condition, participants had to  
365 maintain two stimuli in their VWM after four circles were presented on the encode  
366 screen (Figure 2c). The subsequent arrow indicated whether the stimuli on the right or  
367 left were task relevant. Two circles were presented on the response screen. On the  
368 different trials the brightness of only one of the circles changed to ensure that  
369 participants were remembering the brightness of both circles.

370 The targets for the bright and dark trials were again selected from a specified  
371 brightness ranges. There were two bright ranges (very bright:  $101 \text{ cd/m}^2 - 113 \text{ cd/m}^2$ ,  
372 somewhat bright:  $83 \text{ cd/m}^2 - 92 \text{ cd/m}^2$ ) and two dark ranges (somewhat dark: 23

373  $\text{cd/m}^2 - 32 \text{ cd/m}^2$ , very dark:  $2 \text{ cd/m}^2 - 13 \text{ cd/m}^2$ ). How a stimulus was changed in  
374 different trials depended on the brightness range it was selected from (very bright and  
375 somewhat dark always changed to a darker stimulus, somewhat bright and very dark  
376 always changed to a lighter stimulus). When four circles were presented on the screen,  
377 they were all selected from different brightness ranges, to ensure sufficient variance in  
378 the brightness levels. The size of the brightness difference was controlled by a Quest  
379 adaptive procedure. It was implemented to control for the participants' accuracies,  
380 holding them constant at 75%, and it controlled for the accuracy separately in the four  
381 conditions (Set-Size-One Bright, Set-Size-One Dark, Set-Size-Two Bright, and Set-  
382 Size-Two Dark).

383       After the participants completed the task they were again asked about the  
384 strategies they used throughout the experiment (see supplementary materials for more  
385 information at <https://osf.io/ejxfa/>).

386 *Exclusion Criteria*

387       Trials on which the pupil size at baseline was lower than 2.1 mm or higher than  
388 6.8 mm in diameter ( $N = 10$ ) were again excluded.

## References

- Belopolsky, A. V., & Theeuwes, J. (2011). Selection within visual memory representations activates the oculomotor system. *Neuropsychologia*, *49*(6), 1605–1610. <https://doi.org/10.1016/j.neuropsychologia.2010.12.045>
- Binda, P., & Murray, S. O. (2015). Keeping a large-pupilled eye on high-level visual processing. *Trends in Cognitive Sciences*, *19*(1), 1–3. <https://doi.org/10.1016/j.tics.2014.11.002>
- Binda, P., Pereverzeva, M., & Murray, S. O. (2013). Pupil constrictions to photographs of the sun. *Journal of Vision*, *13*(6), 1–9. <https://doi.org/10.1167/13.6.8>
- Blom, T., Mathôt, S., Olivers, C. N. L., & Van der Stigchel, S. (2016). The pupillary light response reflects encoding, but not maintenance, in visual working memory. *Journal of Experimental Psychology: Human Perception and Performance*, *42*(11), 1716–1723. <https://doi.org/10.1037/xhp0000252>
- Bundesen, C. (1990). A theory of visual attention. *Psychological Review*, *97*(4), 523–547. Retrieved from <http://www.ncbi.nlm.nih.gov/pubmed/2247540>
- Dalmajier, E. S., Manohar, S. G., & Husain, M. (2018). Parallel encoding of information into visual short-term memory. <https://doi.org/398990>.
- Dalmajier, E. S., Mathôt, S., & Van der Stigchel, S. (2014). PyGaze: An open-source, cross-platform toolbox for minimal-effort programming of eyetracking experiments. *Behavior Research Methods*, *46*(4), 913–921. <https://doi.org/10.3758/s13428-013-0422-2>
- Ebitz, B. R., & Moore, T. (2017). Selective modulation of the pupil light reflex by microstimulation of prefrontal cortex. *The Journal of Neuroscience*, *37*(19), 5008–5018. <https://doi.org/10.1523/JNEUROSCI.2433-16.2017>
- Folk, C. L., & Anderson, B. A. (2010). Target-uncertainty effects in attentional capture: Color-singleton set or multiple attentional control settings? *Psychonomic Bulletin and Review*, *17*(3), 421–426. <https://doi.org/doi:10.3758/PBR.17.3.421>
- Ganis, G., Thompson, W. L., & Kosslyn, S. M. (2004). Brain areas underlying visual mental imagery and visual perception: An fMRI study. *Cognitive Brain Research*, *20*(2), 226–241. <https://doi.org/10.1016/j.cogbrainres.2004.02.012>



- Gayet, S., Paffen, C. L. E., & Van der Stigchel, S. (2018). Visual working memory storage recruits sensory processing areas. *Trends in Cognitive Sciences*, 22(3), 189–190. <https://doi.org/10.1016/j.tics.2017.09.011>
- Houtkamp, R., & Roelfsema, P. R. (2009). Matching of visual input to only one item at any one time. *Psychological Research*, 73(3), 317–326. <https://doi.org/10.1007/s00426-008-0157-3>
- Laeng, B., & Sulutvedt, U. (2014). The eye pupil adjusts to imaginary light. *Psychological Science*, 25(1), 188–197. <https://doi.org/10.1177/0956797613503556>
- Mathôt, S. (2018). Pupillometry: Psychology, physiology, and function. *Journal of Cognition*, 1(16), 1–23. <https://doi.org/10.5334/joc.18>
- Mathot, S., Dalmaijer, E., Grainger, J., & Van der Stigchel, S. (2014). The pupillary light response reflects exogenous attention and inhibition of return. *Journal of Vision*, 14(14), 7–7. <https://doi.org/10.1167/14.14.7>
- Mathôt, S., Schreij, D., & Theeuwes, J. (2012). OpenSesame: An open-source, graphical experiment builder for the social sciences. *Behavior Research Methods*, 44(2), 314–324. <https://doi.org/10.3758/s13428-011-0168-7>
- Mathôt, S., van der Linden, L., Grainger, J., & Vitu, F. (2013). The pupillary light response reveals the focus of covert visual attention. *PLoS ONE*, 8(10). <https://doi.org/10.1371/journal.pone.0078168>
- Mathôt, S., van der Linden, L., Grainger, J., & Vitu, F. (2015). The pupillary light response reflects eye-movement preparation. *Journal of Experimental Psychology: Human Perception and Performance*, 41(1), 28–35. <https://doi.org/10.1037/a0038653>
- Moore, T., & Fallah, M. (2001). Control of eye movements and spatial attention. *PNAS*, 98(3), 1273–1276. <https://doi.org/10.1073/pnas.98.3.1273>
- Naber, M., Alvarez, G. A., & Nakayama, K. (2013). Tracking the allocation of attention using human pupillary oscillations. *Frontiers in Psychology*, 4(3), 592–600. <https://doi.org/10.3389/fpsyg.2013.00919>
- Oberauer, K. (2002). Access to information in working memory: Exploring the focus of attention. *Journal of Experimental Psychology. Learning, Memory, and Cognition*, 28(3), 411–421. Retrieved from <http://www.ncbi.nlm.nih.gov/pubmed/12018494>

- Olivers, C. N. L., Peters, J., Houtkamp, R., & Roelfsema, P. R. (2011). Different states in visual working memory: When it guides attention and when it does not. *Trends in Cognitive Sciences*, *15*(7), 327–334.  
<https://doi.org/10.1016/j.tics.2011.05.004>
- Rose, N. S., LaRocque, J. J., Riggall, A. C., Gosseries, O., Starrett, M. J., Meyering, E. E., & Postle, B. R. (2016). Reactivation of latent working memories with transcranial magnetic stimulation. *Science*, *354*(6316), 1136–1139.  
<https://doi.org/10.1126/science.aah7011>
- Schneegans, S., & Bays, P. M. (2017). Restoration of fMRI decodability does not imply latent working memory states. *Journal of Cognitive Neuroscience*, *29*(12), 1977–1994. [https://doi.org/10.1162/jocn\\_a\\_01180](https://doi.org/10.1162/jocn_a_01180)
- Sprague, T. C., Ester, E. F., & Serences, J. T. (2016). Restoring latent visual working memory representations in human cortex. *Neuron*, *91*(3), 694–707.  
<https://doi.org/10.1016/j.neuron.2016.07.006>
- Sreenivasan, K. K., Curtis, C. E., & D’Esposito, M. (2014). Revisiting the role of persistent neural activity during working memory. *Trends in Cognitive Sciences*, *18*(2), 82–89. <https://doi.org/10.1016/j.tics.2013.12.001>
- Stokes, M. G. (2015). “Activity-silent” working memory in prefrontal cortex: A dynamic coding framework. *Trends in Cognitive Sciences*, *19*(7), 394–405.  
<https://doi.org/10.1016/j.tics.2015.05.004>
- van Moorselaar, D., Theeuwes, J., & Olivers, C. N. L. (2014). In competition for the attentional template: Can multiple items within visual working memory guide attention? *Journal of Experimental Psychology: Human Perception and Performance*, *40*(4), 1450–1464. <https://doi.org/10.1037/a0036229>
- Watson, A. B., & Pelli, D. G. (1983). Quest: A Bayesian adaptive psychometric method. *Perception & Psychophysics*, *33*(2), 113–120.  
<https://doi.org/10.3758/BF03202828>
- Wolff, M. J., Jochim, J., Akyürek, E. G., & Stokes, M. G. (2017). Dynamic hidden states underlying working-memory-guided behavior. *Nature Neuroscience*, *20*(6), 864–871. <https://doi.org/10.1038/nn.4546>
- Xu, Y. (2017). Reevaluating the sensory account of visual working memory storage. *Trends in Cognitive Sciences*, *21*(10), 794–815.  
<https://doi.org/10.1016/j.tics.2017.06.013>

- Yi, D.-J., Turk-Browne, N. B., Chun, M. M., & Johnson, M. K. (2008). When a Thought Equals a Look: Refreshing Enhances Perceptual Memory. *Journal of Cognitive Neuroscience*, *20*(8), 1371–1380.  
<https://doi.org/10.1162/jocn.2008.20094>
- Zokaei, N., Heider, M., & Husain, M. (2014). Attention is Required for Maintenance of Feature Binding in Visual Working Memory. *Quarterly Journal of Experimental Psychology*, *67*(6), 1191–1213.  
<https://doi.org/10.1080/17470218.2013.852232>
- Zokaei, N., Manohar, S., Husain, M., & Feredoes, E. (2014). Causal evidence for a privileged working memory state in early visual cortex. *The Journal of Neuroscience*, *34*(1), 158–162. <https://doi.org/10.1523/JNEUROSCI.2899-13.2014>
